# Supplementary material for: Spectroscopic investigation of size-dependent CO2 binding on cationic copper clusters: analysis of the CO2 asymmetric stretch
Source: Royal Society of Chemistry journal article supplement (doi:10.1039/d4cp01797h), 2024-01-01
Supplement: d4cp01797h1.pdf [file d4cp01797h1.pdf]

## Supporting Information

### Spectroscopic Investigation of Size-Dependent CO<sub>2</sub> Binding on Cationic Copper Clusters: Analysis of CO<sub>2</sub> Asymmetric Stretch

A.M. Reider<sup>1</sup>, M. Szalay<sup>2,3</sup>, J. Reichegger<sup>1</sup>, J. Barabas<sup>2,4</sup>, M. Schmidt<sup>1</sup>, M. Kappe<sup>1</sup>, T. Höltzl<sup>2,3\*</sup>, P. Scheier<sup>1</sup>, O.V. Lushchikova<sup>1\*</sup>

<sup>1</sup> Institut für Ionenphysik und Angewandte Physik, Universität Innsbruck, Technikerstraße 25, Innsbruck 6020, Austria.

<sup>2</sup> HUN-REN-BME Computation Driven Chemistry Research Group, Department of Inorganic and Analytical Chemistry, Budapest University of Technology and Economics, Muegyetem rkp. 3, Budapest 1111, Hungary

<sup>3</sup> Furukawa Electric Institute of Technology, Késmárk Utca 28/A, Budapest 1158, Hungary

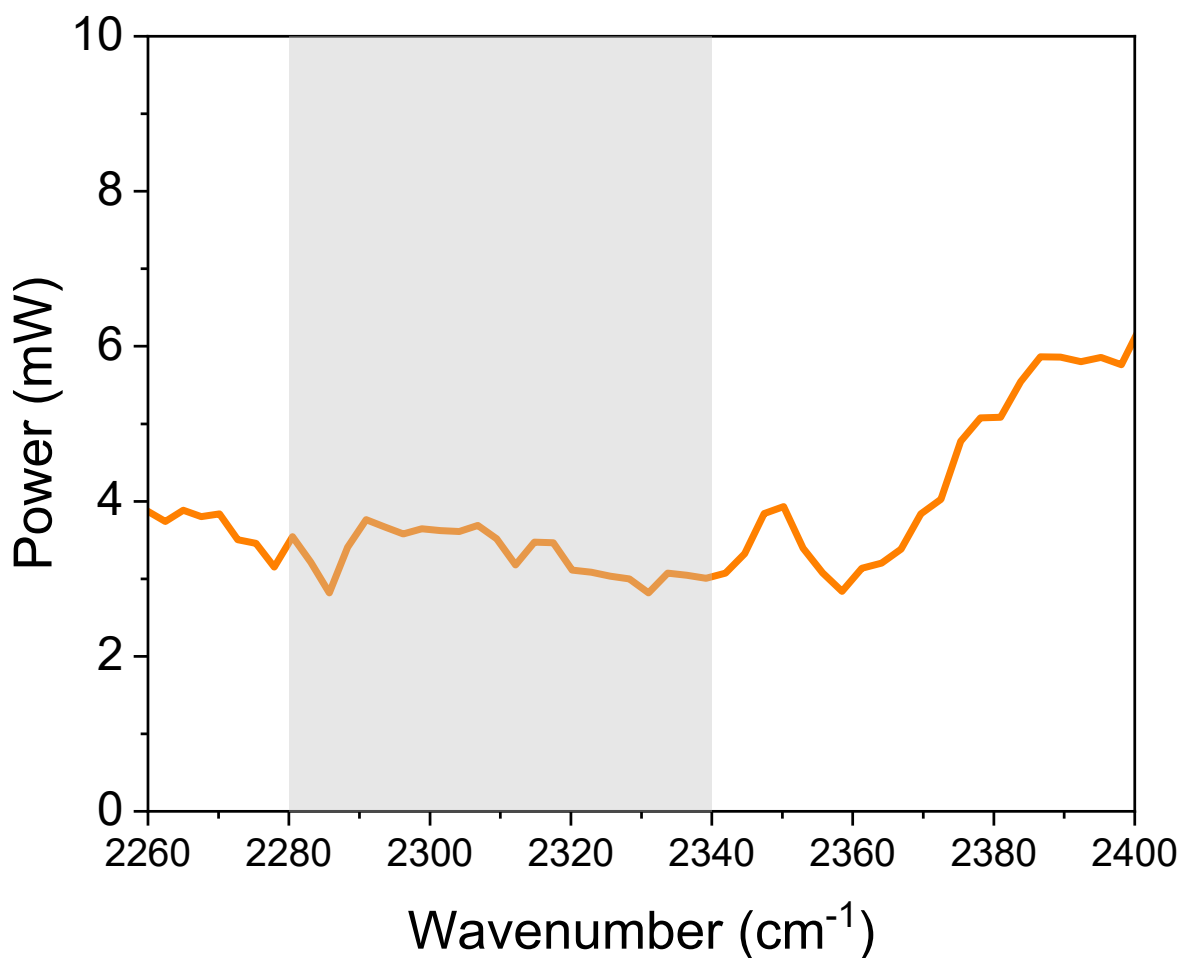

<sup>4</sup> Present address: Gedeon Richter Plc., Spectroscopic Research Department, 19-21 Gyömrői út, Budapest 1103, Hungary

Figure S1: The power curve of the laser employed, with the shaded gray area denoting the frequency range where the CO<sub>2</sub> stretch vibration was detected.

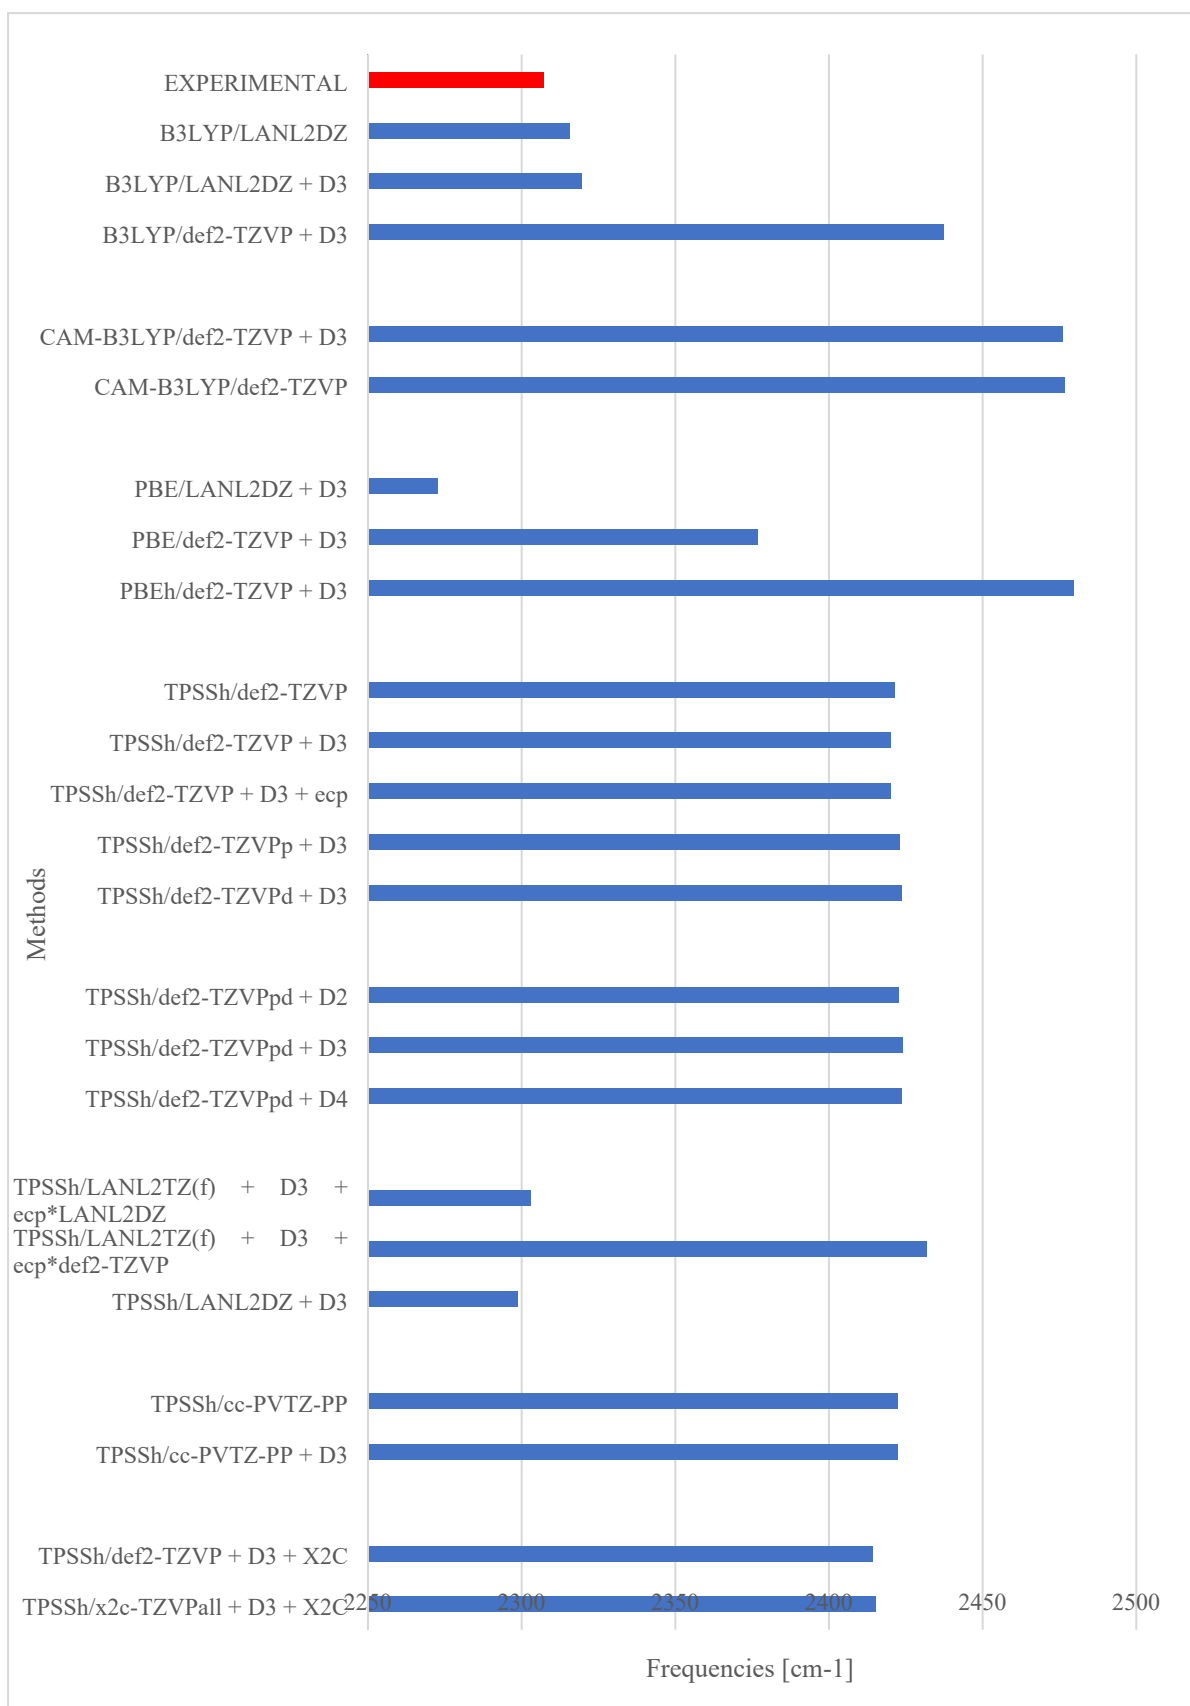

Figure S2: Benchmarking of different methods for harmonic frequency calculations on the asymmetrical stretching vibrational mode of the CO<sub>2</sub> in the Cu<sub>4</sub>[CO<sub>2</sub>]<sup>+</sup> adduct, with carbon mass corresponding to the natural abundance. Ecp\*XXX the application of an effective core potential.

| Method   | TPSSh/LANL2DZ | TPSSh/def2-TZVP | TPSSh-D3/def2-TZVP | TPSSh/cc-pVTZ |
|----------|---------------|-----------------|--------------------|---------------|
| Harmonic | 2267          | 2400            | 2400               | 2406          |
| TOSH     | 2218          | 2352            | 2351               | 2357          |
| VCI[1]   | 2272          | 2408            | 2407               | 2413          |
| VCI[2]   | 2226          | 2359            | 2359               | 2365          |
| VCI[3]   | 2229          | 2362            | 2361               | 2367          |
| VCI[4]   | 2220          | 2353            | 2352               | 2358          |
| VCI[5]   | 2218          | 2352            | 2351               | 2357          |
| VCI[6]   | 2218          | 2352            | 2351               | 2357          |

Table S1: Benchmarking of different methods for anharmonic calculations of the asymmetrical stretching vibrational mode of gas phase CO<sub>2</sub> molecule, with carbon mass set corresponding to natural abundance. The experimental value<sup>1</sup> is 2349 cm<sup>-1</sup>.

#### TPSSh-D3/def2-TZVP

| Method       | Cu[CO <sub>2</sub> ] <sup>+</sup> | Cu <sub>2</sub> [CO <sub>2</sub> ] <sup>+</sup> | Cu <sub>3</sub> [CO <sub>2</sub> ] <sup>+</sup> | Cu <sub>4</sub> [CO <sub>2</sub> ] <sup>+</sup> |
|--------------|-----------------------------------|-------------------------------------------------|-------------------------------------------------|-------------------------------------------------|
| Experimental | <b>2316</b>                       | <b>2323</b>                                     | <b>2318</b>                                     | <b>2312</b>                                     |
| Harmonic     | 2429                              | 2435                                            | 2431                                            | 2419                                            |
| TOSH         | 2381                              | 2385                                            | 2384                                            |                                                 |
| VCI[1]       | 2434                              | 2437                                            | 2437                                            |                                                 |
| VCI[2]       | 2389                              | 2392                                            | 2392                                            |                                                 |
| VCI[3]       | 2391                              | 2395                                            | 2394                                            |                                                 |
| VCI[4]       | 2382                              | 2386                                            | 2385                                            |                                                 |
| VCI[5]       | 2381                              | 2385                                            | 2384                                            |                                                 |
| VCI[6]       | 2381                              | 2385                                            | 2384                                            |                                                 |

Anharmonic scaling factor ( $n=1$ ): 0.98

Anharmonic scaling factor ( $n=2$ ): 0.98

Anharmonic scaling factor ( $n=3$ ): 0.98

#### TPSSh/LANL2DZ

| Method       | Cu[CO <sub>2</sub> ] <sup>+</sup> | Cu <sub>2</sub> [CO <sub>2</sub> ] <sup>+</sup> | Cu <sub>3</sub> [CO <sub>2</sub> ] <sup>+</sup> | Cu <sub>4</sub> [CO <sub>2</sub> ] <sup>+</sup> |
|--------------|-----------------------------------|-------------------------------------------------|-------------------------------------------------|-------------------------------------------------|
| Experimental | <b>2316</b>                       | <b>2323</b>                                     | <b>2318</b>                                     | <b>2312</b>                                     |
| Harmonic     | 2325                              | 2311                                            | 2307                                            | 2300                                            |
| TOSH         | 2277                              | 2262                                            | 2257                                            |                                                 |
| VCI[1]       | 2326                              | 2314                                            | 2309                                            |                                                 |
| VCI[2]       | 2284                              | 2270                                            | 2265                                            |                                                 |
| VCI[3]       | 2287                              | 2272                                            | 2268                                            |                                                 |
| VCI[4]       | 2278                              | 2263                                            | 2259                                            |                                                 |
| VCI[5]       | 2277                              | 2262                                            | 2258                                            |                                                 |
| VCI[6]       | 2277                              | 2262                                            | 2257                                            |                                                 |

Anharmonic scaling factor ( $n=1$ ): 0.98

Anharmonic scaling factor ( $n=2$ ): 0.98

Anharmonic scaling factor ( $n=3$ ): 0.98

Table S2: Benchmarking of TPSSh-D3/def2-TZVP and TPSSh/LANL2DZ methods for anharmonic calculations of the asymmetrical stretching vibrational mode of Cu<sub>*n*</sub>[CO<sub>2</sub>]<sup>+</sup> complexes with  $n = 1-4$ , with carbon mass corresponding to natural abundance.

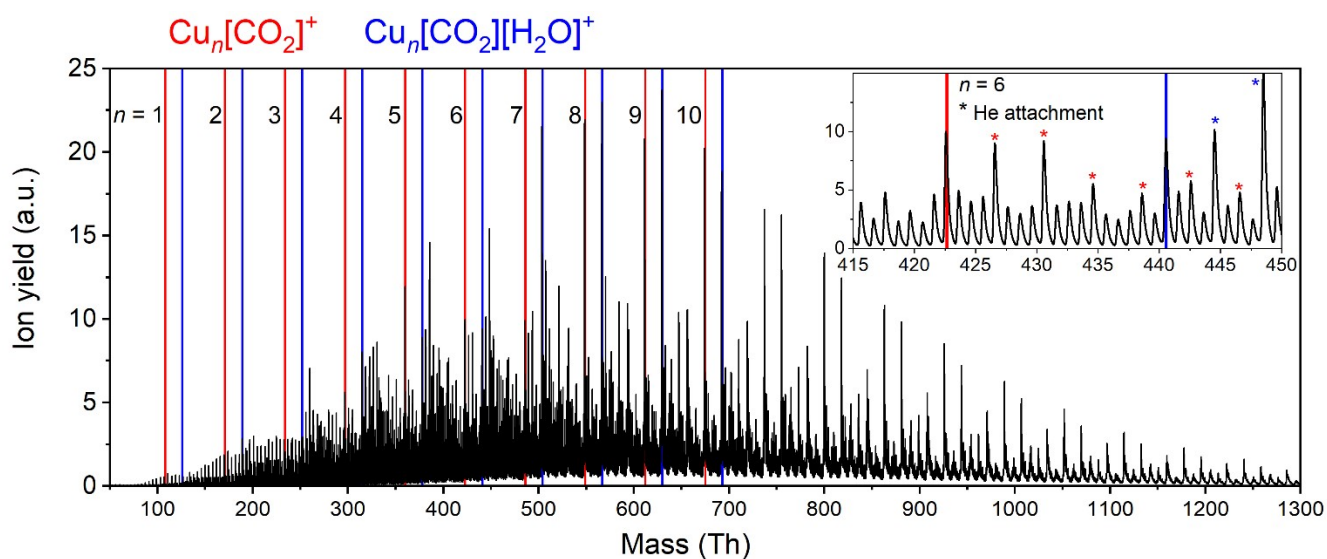

Figure S3: Mass spectrum where the experimental setup was optimised to create larger  $\text{Cu}_n$  clusters. The red and blue vertical lines highlight the positions of the  $\text{Cu}_n[\text{CO}_2]^+$  and  $\text{Cu}_n[\text{CO}_2][\text{H}_2\text{O}]^+$ , respectively, for  $n = 1 - 10$ . In the inset the He attachment on the  $\text{Cu}_6[\text{CO}_2]^+$  and  $\text{Cu}_6[\text{CO}_2][\text{H}_2\text{O}]^+$  cluster is shown with red and blue asterisks accordingly.

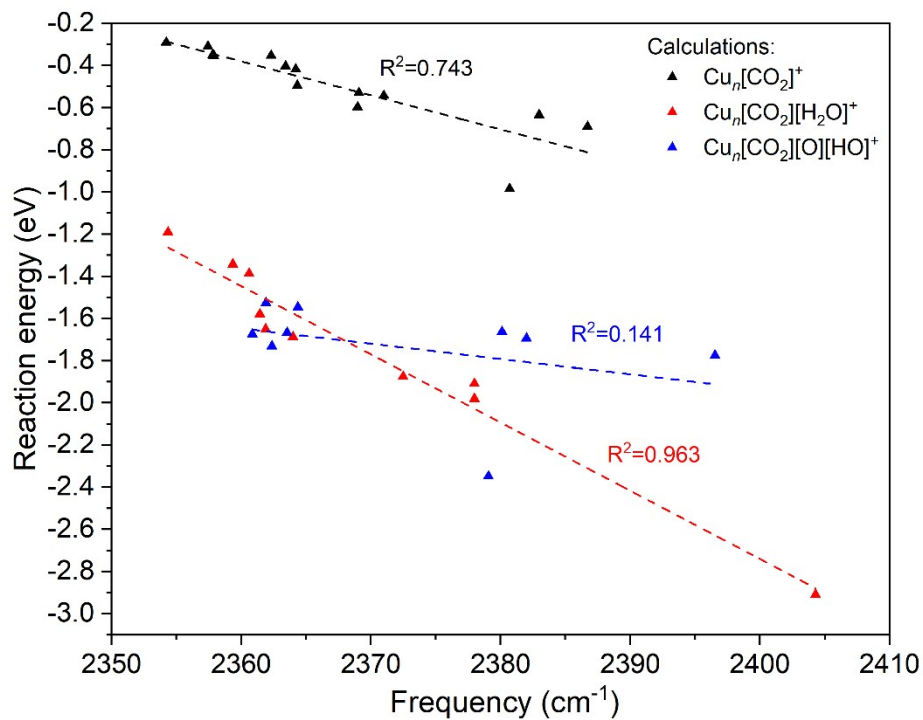

Figure S4: Correlation between binding energies and position of the asymmetric stretching vibrational mode of the bound CO<sub>2</sub> for all calculated Cu<sub>n</sub>[CO<sub>2</sub>]<sup>+</sup>, Cu<sub>n</sub>[CO<sub>2</sub>][H<sub>2</sub>O]<sup>+</sup> and Cu<sub>n</sub>[CO<sub>2</sub>][H][OH]<sup>+</sup> structures. The linear fit is shown with a dashed line and R<sup>2</sup> is calculated for each system. With carbon mass corresponding to natural abundance.

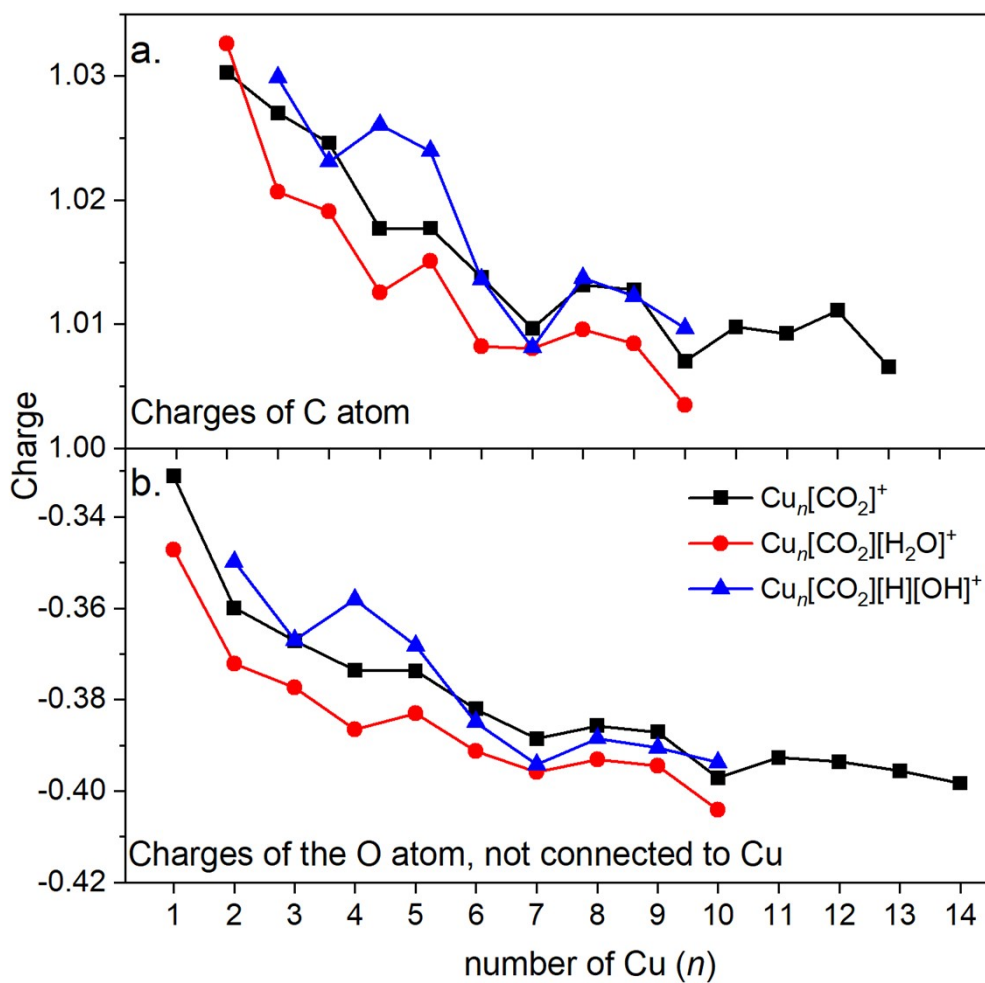

Figure S5: a. Charges of the C atom in the  $\text{CO}_2$  as a function of different cluster-complex sizes. b. Charges of the O atom (which is NOT connected to the cluster) in the  $\text{CO}_2$  as a function of different cluster-complex sizes.

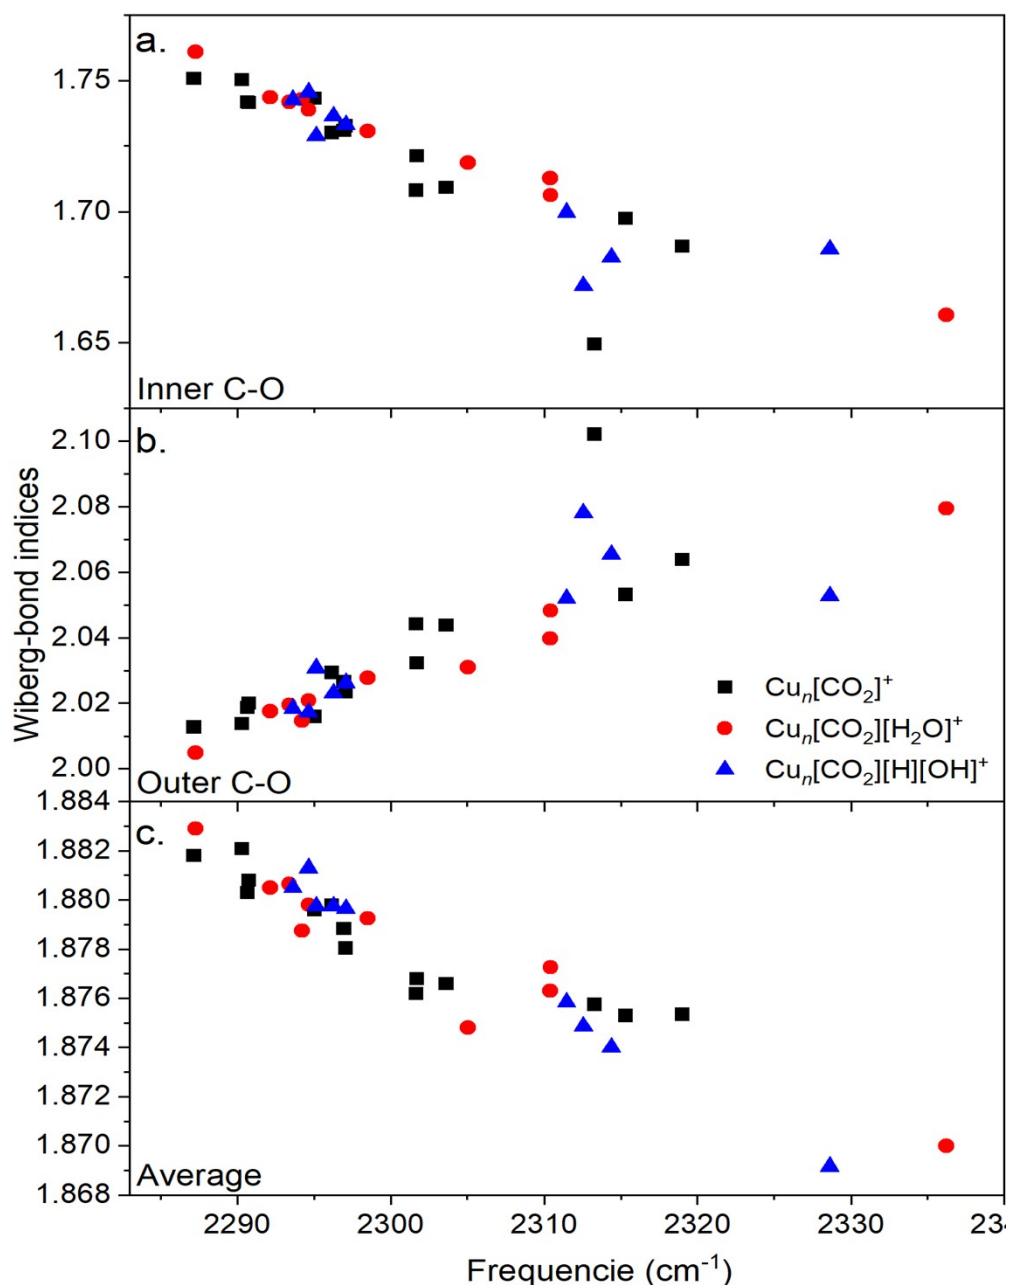

Figure S6: Wiberg bond indices of a. the C-O bond (where oxygen is connected to the cluster, i.e. inner oxygen); b. the C-O bond (where oxygen is not connected to the cluster, i.e. outer oxygen); c. both C-O bonds (inner and outer) with respect to the CO<sub>2</sub> asymmetric stretch vibrational frequency.

1. T. Shimanouchi, *Tables of molecular vibrational frequencies*, National Bureau of Standards Washington, DC, 1972.
